# Supplementary material for: Designing highly efficient enzyme-based carbonaceous foams electrodes for biofuel cells
Source: Royal Society of Chemistry journal article supplement (doi:10.1039/c003488f), 2010-01-01

## Supporting information

# Designing Highly Efficient Enzyme-Based Carbonaceous Foams Electrodes for Biofuel Cells

Victoria Flexer, Nicolas Brun, Rénal Backov\* and Nicolas Mano\*

### Energy Dispersive X-ray Spectroscopy

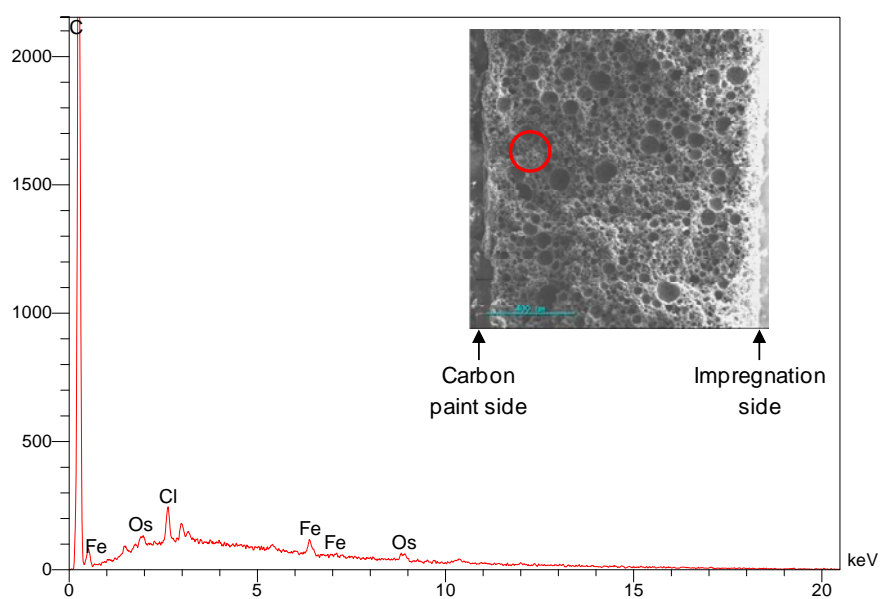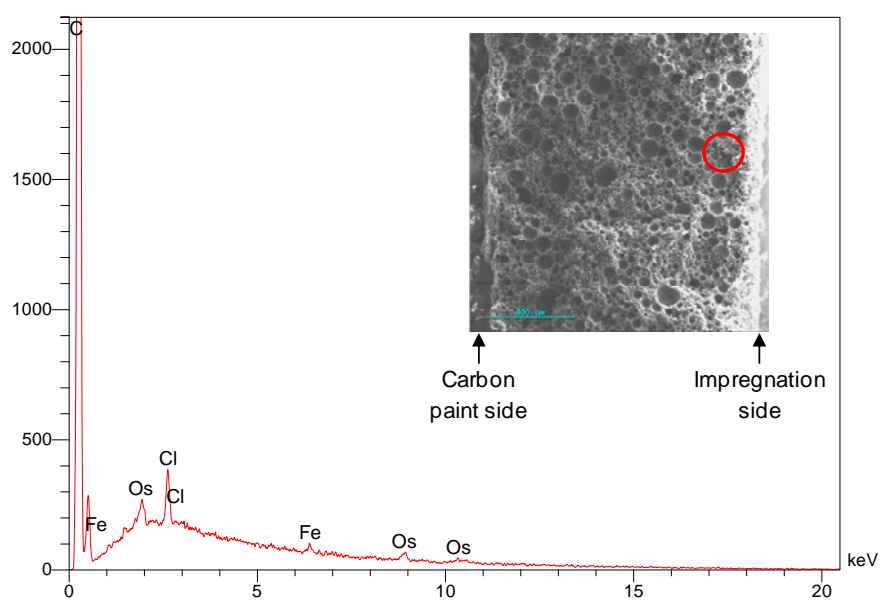

Supplement: c003488f.pdf [file c003488f.pdf]
